# Supplementary material for: Structural modeling of the flagellum MS ring protein FliF reveals similarities to the type III secretion system and sporulation complex
Source: PubMed Central journal article supplement (PMC4768692; doi:10.7717/peerj.1718), 2016-02-22
Supplement: peerj-04-1718-s002.pdf [file peerj-04-1718-s002.pdf]

A

FliF<sub>228-309</sub>

| #                                                                                                                                                                                                                                 | Template               | Alignment Coverage | 3D Model                                                                          | Confidence | % i.d. | Template Information                                                                                                                                                                               |
|-----------------------------------------------------------------------------------------------------------------------------------------------------------------------------------------------------------------------------------|------------------------|--------------------|-----------------------------------------------------------------------------------|------------|--------|----------------------------------------------------------------------------------------------------------------------------------------------------------------------------------------------------|
| 1                                                                                                                                                                                                                                 | <a href="#">c2y9jt</a> | Alignment          | 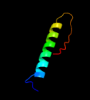 | 48.0       | 18     | <b>PDB header:</b> protein transport<br><b>Chain:</b> T; <b>PDB Molecule:</b> protein prgh;<br><b>PDBTitle:</b> three-dimensional model of salmonella's needle complex at2 subnanometer resolution |
| Predicted Secondary structure:                                                                                                                   |                        |                    |                                                                                   |            |        |                                                                                                                                                                                                    |
| <b>Query_Sequence</b> T S G R D L N D A Q L K F A N D V E S R I Q R R I E A I L S P T V G N G N V H A Q V T A<br><b>Template_Sequence</b> F P A D S L V S S P R A E K A R L Y S A T E Q R L E Q S I Q T M E G V L S A R V H I S Y |                        |                    |                                                                                   |            |        |                                                                                                                                                                                                    |
| Template Known Secondary structure:                                                                                                              |                        |                    |                                                                                   |            |        |                                                                                                                                                                                                    |
| Template Predicted Secondary structure:                                                                                                          |                        |                    |                                                                                   |            |        |                                                                                                                                                                                                    |

B

FliF<sub>356-443</sub>

| #                                                                                                                                                                                                                                                       | Template               | Alignment Coverage | 3D Model                                                                            | Confidence | % i.d. | Template Information                                                                                                                                                                 |
|---------------------------------------------------------------------------------------------------------------------------------------------------------------------------------------------------------------------------------------------------------|------------------------|--------------------|-------------------------------------------------------------------------------------|------------|--------|--------------------------------------------------------------------------------------------------------------------------------------------------------------------------------------|
| 1                                                                                                                                                                                                                                                       | <a href="#">c3uz0A</a> | Alignment          |  | 71.5       | 23     | <b>PDB header:</b> transport protein<br><b>Chain:</b> A; <b>PDB Molecule:</b> stage iii sporulation protein ah;<br><b>PDBTitle:</b> crystal structure of spoiiiah and spoiiq complex |
| Predicted Secondary structure:                                                                                                                                        |                        |                    |                                                                                     |            |        |                                                                                                                                                                                      |
| <b>Query_Sequence</b> S V A V V V N Y K T L A D G K P L P L T A D Q M K Q T E D I T R E A M G F S D K R G D T L N V N S P<br><b>Template_Sequence</b> K I N I T V K S D K . . . . . H S K S K A T A T I D I V A K E I K T M K . . . . . D V A V T F E P |                        |                    |                                                                                     |            |        |                                                                                                                                                                                      |
| Template Known Secondary structure:                                                                                                                                   |                        |                    |                                                                                     |            |        |                                                                                                                                                                                      |
| Template Predicted Secondary structure:                                                                                                                               |                        |                    |                                                                                     |            |        |                                                                                                                                                                                      |

C

FliF<sub>228-443</sub>  $\Delta$ 274-378

| # | Template               | Alignment Coverage | 3D Model                                                                            | Confidence | % i.d. | Template Information                                                                                                                                                                                |
|---|------------------------|--------------------|-------------------------------------------------------------------------------------|------------|--------|-----------------------------------------------------------------------------------------------------------------------------------------------------------------------------------------------------|
| 1 | <a href="#">c1yj7A</a> | Alignment          |    | 88.4       | 21     | <b>PDB header:</b> protein transport<br><b>Chain:</b> A; <b>PDB Molecule:</b> escj;<br><b>PDBTitle:</b> crystal structure of enteropathogenic e.coli (epec) type iii secretion2 system protein escj |
| 2 | <a href="#">c2y9jt</a> | Alignment          |    | 76.6       | 16     | <b>PDB header:</b> protein transport<br><b>Chain:</b> T; <b>PDB Molecule:</b> protein prgh;<br><b>PDBTitle:</b> three-dimensional model of salmonella's needle complex at2 subnanometer resolution  |
| 3 | <a href="#">c2qsfX</a> | Alignment          |  | 45.0       | 23     | <b>PDB header:</b> dna binding protein<br><b>Chain:</b> X; <b>PDB Molecule:</b> uv excision repair protein rad23;<br><b>PDBTitle:</b> crystal structure of the rad4-rad23 complex                   |
| 4 | <a href="#">c3uz0A</a> | Alignment          |  | 40.5       | 20     | <b>PDB header:</b> transport protein<br><b>Chain:</b> A; <b>PDB Molecule:</b> stage iii sporulation protein ah;<br><b>PDBTitle:</b> crystal structure of spoiiiah and spoiiq complex                |
